# Supplementary material for: Proteomic analysis of protein phosphatase Z1 from Candida albicans
Source: PubMed Central journal article supplement (PMC5570430; doi:10.1371/journal.pone.0183176), 2017-08-24
Supplement: pone.0183176.s005.pdf [file pone.0183176.s005.pdf]

S1 Table. Oligonucleotide primers used for RT-qPCR analysis

| Protein name <sup>1</sup>        | Gene ID <sup>2</sup> | Upper (U) primer (5'-3') | Lower (L) primer (5'-3') | Tm U - L (C°) | Product (bp) |
|----------------------------------|----------------------|--------------------------|--------------------------|---------------|--------------|
| 14-3-3 protein homolog           | <i>C1_03220C</i>     | CACCAACCCATCCAATCAG      | AATCAGCAACAGCATCATCG     | 62.2-62.2     | 126          |
| 40S ribosomal protein S0         | <i>C3_05370C*</i>    | TGTTATTAGCTGCCAACGTCC    | CAGCAGCAATGATTCTGGC      | 62.3-63.0     | 153          |
| 40S ribosomal protein S7-A       | <i>C3_01490W</i>     | TCAAGCTTTCGTTGATTTGG     | GGTGGTGGAACGAAAACAG      | 61.2-61.4     | 129          |
| 60S acidic ribosomal protein P0  | <i>C7_00990W</i>     | TCCGAAGCTACCTTGTTGAAC    | GATGGATGATGGGAAGACTTG    | 60.5-58.5     | 103          |
| 60S ribosomal protein L20        | <i>C4_01520C</i>     | GTTGGTGCTGTTGAAACCATG    | CTCTGTGTGGTAATGGGAATTTC  | 61.6-61.8     | 169          |
| Adenylosuccinate synthetase      | <i>C1_09640W</i>     | TTGGTTGAAGGTGCTAATGC     | ATGGTTCTTGGAGGAATACCC    | 61.0-61.3     | 122          |
| ATP-dependent RNA helicase eIF4A | <i>C1_01350C</i>     | ACCGCTACCTTTACCATTCTG    | ACCACCAATAGAAGCATGGAC    | 61.6-61.2     | 165          |
| Cys-Gly metallodipeptidase DUG1  | <i>C5_04300C</i>     | GATATGGTTGCTCCTTTGACTG   | ATGAAAGGGATGGGAATCTC     | 60.9-60.1     | 155          |
| Deoxyhypusine hydroxylase        | <i>C2_07290W</i>     | CGAAGCTCTTGGTGCTCTTG     | GCTTTTTCTGAGTTTTCCAGTG   | 63.6-63.5     | 138          |
| D-lactate dehydrogenase          | <i>C3_03040W</i>     | CGGTGACTTCCCATTCTATG     | ATTTGAGCCTCATCTTGTGC     | 60.3-60.2     | 144          |
| Elongation factor 1-beta         | <i>C4_04480C**</i>   | ATGGTACTACTGCCACTCAAGC   | CAGTGAATGAAGCAATGTGGT    | 60.6-61.2     | 102          |
| Elongation factor 2              | <i>C2_03100W**</i>   | ACAAGATGGTTGCTTTCCTATTG  | TTGGCAGCGGAAATAATACC     | 61.6-62.1     | 154          |
| Elongation factor 3              | <i>C5_01580C</i>     | GATCACAATTGGGTCCAAGG     | AGCAGCGGCAATCTTGTTAC     | 62.5-62.6     | 105          |
| Guanylate kinase                 | <i>C5_03790W</i>     | CATCTGCCAATAGACCAATCG    | TGGTTTTCTGGTGGTGGTTTG    | 62.7-61.8     | 128          |
| Heat shock protein SSA1          | <i>C1_13480W</i>     | CATTAGTGGTGCTTATGGTGC    | ACTTCTTCAACAGTTGGTCCA    | 59.5-60.0     | 164          |

|                                                          |                    |                          |                         |           |     |
|----------------------------------------------------------|--------------------|--------------------------|-------------------------|-----------|-----|
| Inosine triphosphate pyrophosphatase                     | <i>C5_03860W</i>   | GACTCCTCCTCCTCCTCATC     | CAATGACTTTAGCAGCAGCTTG  | 60.2-62.3 | 148 |
| Isocitrate dehydrogenase [NAD] subunit 1 (mitochondrial) | <i>C1_09630W**</i> | CGTTATTGCTCAAAAGAAGACTCC | CTTGACCAGCACCATCACC     | 60.1-62.7 | 125 |
| Peptidyl-prolyl cis-trans isomerase                      | <i>C2_02320C</i>   | TGCTTCAAGGTGGTGATTTTG    | GGACCAGCATTGGCCATAG     | 63.3-63.8 | 139 |
| Peptidyl-prolyl cis-trans isomerase                      | <i>C3_06360C</i>   | CAATCGCATTGATTGCTTC      | ACAACCGTGCCAAAGAGAC     | 60.2-61.1 | 170 |
| Peroxiredoxin TSA1                                       | <i>C3_06180C</i>   | AAATTTGCCGAAAAGGATGC     | TCTGGACAAGGAGTGGTTGG    | 62.2-61.6 | 150 |
| Protein phosphatase Z1                                   | <i>CR_06420W</i>   | TCACAACAACGTCCACAACCA    | GACAACGGTGAACCTGGC      | 62.9-61.1 | 173 |
| Protein URE2                                             | <i>C2_04710C</i>   | GGTGAATGTTTATTATGGTCG    | CTTTCTACAGCACTTGGTACTGG | 60.1-60.2 | 152 |
| Rad23p                                                   | <i>C2_01850W</i>   | AACAACCACAACCAGCAGC      | ATGCGGCTCTTAATGCAGC     | 62.2-63.7 | 129 |
| Ribosomal 60S subunit protein L9B                        | <i>C3_02470C</i>   | CCCAGAAGGTGTCACTGTTG     | GCAGCAACGTGTTTTCTGTC    | 61.5-61.9 | 165 |
| Transketolase 1                                          | <i>C1_08320W</i>   | TTCACCTTCGACCAACAATC     | GCACCAAATCTGTTCAAACC    | 60.9-60.4 | 141 |
| Ubiquitin-activating enzyme E1                           | <i>C3_06500W</i>   | CAGGTGAAGAACCATTGAGC     | GGCAAACCTTGACATAATCGC   | 60.7-60.5 | 113 |
| Actin 1                                                  | <i>C1_13700W</i>   | GTTGCTCCAGAAGAACATCC     | ACCATCACCAGAATCCAAAAC   | 59.7-61.0 | 192 |

Based on <sup>1</sup><http://www.uniprot.org/> and <sup>2</sup> <http://www.candidagenome.org/>.

\* The primers are flanking an intron in the gene.

\*\*The upper primer is spanning an exon-intron boundary in the gene.

*C1\_13700W* was used as an internal control in all experiments.
