# Supplementary material for: Proteomic analysis of protein phosphatase Z1 from Candida albicans
Source: PubMed Central journal article supplement (PMC5570430; doi:10.1371/journal.pone.0183176), 2017-08-24
Supplement: pone.0183176.s007.pdf [file pone.0183176.s007.pdf]

S3 Table. Identification of proteins in spots that exhibit significant Pro-Q Diamond-staining intensity changes in the absence of CaPpz1

| Protein Name <sup>1</sup>            | Protein ID <sup>1</sup> | Systemic gene name <sup>2</sup> | Standard gene name <sup>1</sup> | Protein abbreviation <sup>2</sup> | Spot ID | Fold change | p value |
|--------------------------------------|-------------------------|---------------------------------|---------------------------------|-----------------------------------|---------|-------------|---------|
| 40S ribosomal protein S0             | O42817                  | <i>C3_05370C</i>                | <i>YST1</i>                     | Yst1                              | 22      | -2.79       | 0.041   |
| 40S ribosomal protein S7-A           | Q5AJ93                  | <i>C3_01490W</i>                | <i>RPS7A</i>                    | Rps7A                             | 04      | -2.58       | 0.047   |
| 60S acidic ribosomal protein P0*     | A0A1D8PQS0              | <i>C7_00990W</i>                | <i>RPP0</i>                     | Rpp0                              | 20      | 2.56        | 0.046   |
|                                      |                         |                                 |                                 |                                   | 21      | 2.63        | 0.005   |
| 60S ribosomal protein L20            | A0A1D8PLC9              | <i>C4_01520C</i>                | <i>RPL20B</i>                   | Rpl20B                            | 10      | -4.81       | 0.019   |
| ATP-dependent RNA helicase eIF4A     | P87206                  | <i>C1_01350C</i>                | <i>TIF1</i>                     | Tif1                              | 23      | -2.05       | 0.014   |
| Cys-Gly metallodipeptidase DUG1      | Q5AKA5                  | <i>C5_04300C</i>                | <i>DUG1</i>                     | Dug1-like**                       | 36      | 1.37        | 0.008   |
| Deoxyhypusine hydroxylase*           | Q59Z14                  | <i>C2_07290W</i>                | <i>LIA1</i>                     | Lia1-like**                       | 17      | -3.09       | 0.019   |
|                                      |                         |                                 |                                 |                                   | 18      | -2.32       | 0.008   |
| D-lactate dehydrogenase              | A0A1D8PJK5              | <i>C3_03040W</i>                | <i>AIP2</i>                     | Aip1                              | 34      | -2.05       | 0.026   |
| Elongation factor 2                  | Q5A0M4                  | <i>C2_03100W</i>                | <i>EFT2</i>                     | Eft2                              | 28      | 2.79        | 0.008   |
| Elongation factor 3                  | P25997                  | <i>C5_01580C</i>                | <i>CEF3</i>                     | Cef3                              | 27      | -2.38       | 0.008   |
| Guanylate kinase                     | A0A1D8PNS0              | <i>C5_03790W</i>                | <i>GUK1</i>                     | Guk1                              | 03      | -4.57       | 0.003   |
| Heat shock protein SSA1              | P41797                  | <i>C1_13480W</i>                | <i>HSP70</i>                    | Hsp70/Ssa1                        | 32      | -3.32       | 0.024   |
| Inosine triphosphate pyrophosphatase | Q59N80                  | <i>C5_03860W</i>                | <i>HAM1</i>                     | Ham1                              | 01      | -2.79       | 0.034   |
| Peptidyl-prolyl cis-trans isomerase  | Q5ALM6                  | <i>C2_02320C</i>                | <i>CPR3</i>                     | Cpr3                              | 02      | -2.59       | 0.018   |
| Peptidyl-prolyl cis-trans isomerase  | A0A1D8PKL0              | <i>C3_06360C</i>                | <i>CYP5</i>                     | Cyp5                              | 07      | -2.02       | 0.0003  |
| Peroxisredoxin TSA1                  | Q9Y7F0                  | <i>C3_06180C</i>                | <i>TSA1</i>                     | Tsa1                              | 16      | -2.18       | 0.028   |
| Rad23p                               | A0A1D8PGE3              | <i>C2_01850W</i>                | <i>RAD23</i>                    | Rad23                             | 39      | 1.95        | 0.006   |
| Ribosomal 60S subunit protein L9B    | Q5AEN2                  | <i>C3_02470C</i>                | <i>RPL9B</i>                    | Rpl9B                             | 13      | -3.23       | 0.049   |
| Transketolase 1                      | Q5A750                  | <i>C1_08320W</i>                | <i>TKL1</i>                     | Tkl1                              | 29      | 1.78        | 0.045   |
| Ubiquitin-activating enzyme E1*      | A0A1D8PKJ3              | <i>C3_06500W</i>                | <i>UBA1</i>                     | Uba1                              | 30      | 1.90        | 0.006   |
|                                      |                         |                                 |                                 |                                   | 31      | -2.31       | 0.037   |

Based on <sup>1</sup><http://www.uniprot.org/> and <sup>2</sup> <http://www.candidagenome.org/>.

\*The same protein was identified in two separate spots.

\*\* The abbreviation is based on the name of the *S. cerevisiae* ortholog.
