# Supplementary material for: Proteomic analysis of protein phosphatase Z1 from Candida albicans
Source: PubMed Central journal article supplement (PMC5570430; doi:10.1371/journal.pone.0183176), 2017-08-24
Supplement: pone.0183176.s008.pdf [file pone.0183176.s008.pdf]

S4 Table. Identification of proteins in spots that exhibit significant RuBPS staining intensity changes in the absence of CaPpz1

| Protein Name <sup>1</sup>                                | Protein ID <sup>1</sup> | Systemic gene name <sup>2</sup> | Standard gene name <sup>1</sup> | Protein abbreviation <sup>2</sup> | Spot ID <sup>#</sup> | Fold change | p value |
|----------------------------------------------------------|-------------------------|---------------------------------|---------------------------------|-----------------------------------|----------------------|-------------|---------|
| 14-3-3 protein homolog                                   | O42766                  | <i>C1_03220C</i>                | <i>BMH1</i>                     | Bmh1                              | 47                   | -1.97       | 0.006   |
| 40S ribosomal protein S0                                 | O42817                  | <i>C3_05370C</i>                | <i>YST1</i>                     | Yst1                              | <b>22</b>            | -2.35       | 0.042   |
| 60S ribosomal protein L20                                | A0A1D8PLC9              | <i>C4_01520C</i>                | <i>RPL20B</i>                   | Rpl20B                            | <b>10</b>            | -2.21       | 0.021   |
| Adenylosuccinate synthetase                              | P0CH96                  | <i>C1_09640W</i>                | <i>ADE12</i>                    | Ade12                             | 46                   | 2.60        | 0.045   |
| Deoxyhypusine hydroxylase                                | Q59Z14                  | <i>C2_07290W</i>                | <i>LIA1</i>                     | Lia1-like**                       | <b>18</b>            | -1.59       | 0.019   |
| Elongation factor 1-beta                                 | A0A1D8PM35              | <i>C4_04480C</i>                | <i>EFB1</i>                     | Efb1                              | 43                   | -2.37       | 0.002   |
| Elongation factor 3*                                     | P25997                  | <i>C5_01580C</i>                | <i>CEF3</i>                     | Cef3                              | 44                   | -7.08       | 0.004   |
|                                                          |                         |                                 |                                 |                                   | <b>27</b>            | -3.63       | 0.020   |
| Heat shock protein SSA1                                  | P41797                  | <i>C1_13480W</i>                | <i>HSP70</i>                    | Hsp70/Ssa1                        | <b>32</b>            | -1.52       | 0.042   |
| Isocitrate dehydrogenase [NAD] subunit 1 (mitochondrial) | A0A1D8PEM5              | <i>C1_09630W</i>                | <i>IDH1</i>                     | Idh1                              | 45                   | 2.76        | 0.017   |
| Peptidyl-prolyl cis-trans isomerase                      | Q5ALM6                  | <i>C2_02320C</i>                | <i>CPR3</i>                     | Cpr3                              | <b>02</b>            | -2.20       | 0.006   |
| Peroxiredoxin TSA1                                       | Q9Y7F0                  | <i>C3_06180C</i>                | <i>TSA1</i>                     | Tsa1                              | <b>16</b>            | -2.23       | 0.002   |
| Protein URE2                                             | Q96WL3                  | <i>C2_04710C</i>                | <i>URE2</i>                     | Ure2                              | 48                   | 1.95        | 0.0004  |
| Transketolase 1                                          | Q5A750                  | <i>C1_08320W</i>                | <i>TKL1</i>                     | Tkl1                              | <b>29</b>            | 1.84        | 0.012   |
| Ubiquitin-activating enzyme E1                           | A0A1D8PKJ3              | <i>C3_06500W</i>                | <i>UBA1</i>                     | Uba1                              | <b>30</b>            | 1.59        | 0.029   |

Based on <sup>1</sup><http://www.uniprot.org/> and <sup>2</sup> <http://www.candidagenome.org/>.

\*The protein was identified in two separate spots.

\*\* The abbreviation is based on the name of the *S. cerevisiae* ortholog.

# Phosphoprotein containing spots (see S3 Table) are highlighted in bold face.
